# Supplementary material for: Physiological cell bioprinting density in human bone-derived cell-laden scaffolds enhances matrix mineralization rate and stiffness under dynamic loading
Source: Front Bioeng Biotechnol. 2024 Feb 14;12:1310289. doi: 10.3389/fbioe.2024.1310289 (PMC10900528; doi:10.3389/fbioe.2024.1310289)
Supplement: Supplementary file 2 [file Table1.XLSX]

## Sheet: Sheet1
Antibody/Dye	Dilution	Species	Supplier	Catalogue Number
Osteocalcin	1:200	Rabbit	Abcam	ab93876
Sclerostin	1:200	Rabbit	Sigma-Aldrich	SAB1300753
Collagen I	1:200	Rabbit	Abcam	ab34710
Anti-Rabbit AF647	1:1000	Donkey	Abcam	ab150075
Phalloidin-TRITC	1:400	-	Sigma-Aldrich	P1951
Phalloidin AF555	1:500	-	Invitrogen	A34055
Hoechst 33342	1:200	-	Sigma-Aldrich	B2261
